# Supplementary material for: Investigating the differences in calculating global mean surface CO 2 abundance: the impact of analysis methodologies and site selection
Source: Copernicus journal article supplement (doi:10.5194/egusphere-2023-1173), 2023-06-23
Supplement: Supplementary file 1 [file egusphere-2023-1173-supplement.pdf]

# Investigating the differences in calculating global mean surface CO<sub>2</sub> abundance: the impact of analysis methodologies and site selection

Zhendong Wu<sup>1,2,\*</sup>, Alex Vermeulen<sup>2,\*</sup>, Yousuke Sawa<sup>3</sup>, Ute Karstens<sup>1,2</sup>, Wouter Peters<sup>4,5</sup>, Remco de Kok<sup>4</sup>, Xin Lan<sup>6,7</sup>, Yasuyuki Nagai<sup>3</sup>, Akinori Ogi<sup>3</sup>, Oksana Tarasova<sup>8</sup>

<sup>1</sup>ICOS Carbon Portal at Lund University, Department of Physical Geography and Ecosystem Sciences, Lund, Sweden

<sup>2</sup>ICOS ERIC, Carbon Portal, Lund, Sweden

<sup>3</sup>Japan Meteorological Agency (JMA), Tokyo, Japan

<sup>4</sup>Wageningen University, Wageningen, The Netherlands

<sup>5</sup>University of Groningen, Groningen, The Netherlands

<sup>6</sup>NOAA Global Monitoring Laboratory (GML), Boulder, USA

<sup>7</sup>Cooperative Institute for Research in Environmental Sciences, University of Colorado Boulder, USA

<sup>8</sup>WMO, Geneva, Switzerland

*Correspondence to:* Alex Vermeulen (alex.vermeulen@icos-ri.eu), and Zhendong Wu (zhendong.wu@nateko.lu.se)

## Contents of this file

Text S1 to S4

Figures S1 to S4

Tables S1 to S3

37 **Text S1. The WDCGG global analysis method**

38 The WDCGG method consists of seven separate steps. The full documentation can be found in Tsutsumi et al. (2009).

39 **Step 1: Station selection based on traceability to the WMO standard scale**

40 In order to avoid the potential biases that can be introduced by using different concentration scales, WDCGG only uses  
41 data from stations that report results traceable to the most recent CO<sub>2</sub> scale from the GAW Central Calibration  
42 Laboratories (CCL) assigned for that parameter. The current scale is the WMO standard scale WMO-CO2-X2019.

43 **Step 2: Integration of parallel data from the same station**

44 The WDCGG method uses continuous (hourly averaged) observations as these better represent the average  
45 concentrations compared to the flask-air samples taking during daytime once per two weeks. For remote stations where  
46 both flask and continuous data exist, NOAA found offsets between continuous and flask based monthly averages of  
47 0.16-0.35 ppm (Tans et al., 1990), in less remote areas this difference can be expected to be larger. For selected stations  
48 flask data are used for gap filling when continuous data is lacking.

49 **Step 3: Selection of stations suitable for global analysis**

50 All of station data are normalized against the South Pole and averaged for the whole observation period. The normalized  
51 and averaged data points are plotted against latitude, and a curve is fitted by using a nearest-neighbour local-quadratic  
52 regression. The stations with normalized data locate outside the 3 standard deviations of the latitudinal fitted curve are  
53 excluded from the selection. This selection procedure is repeated until all stations in the selection locating within the 3  
54 standard deviations of the latitudinal fitted curve. This procedure results in 139 stations remaining, which have a  
55 reasonable latitudinal scatter range (Figure 1).

56 **Step 4: Abstraction of a station's average seasonal variation expressed by the Fourier harmonics**

57 The average seasonal variation is obtained from the longest continuous segment of data by using three Fourier  
58 harmonics. Here is loop procedure where the following processes a-d are repeated until neither the long-term trend nor  
59 the average seasonal variation changes: a). de-trend original data, b). apply the harmonics to obtain seasonality, c). de-  
60 seasonality from original data to obtain long-term trend, d) smooth the long-term trend by using low-pass filter (a cut-  
61 off frequency of 0.48 cycle / year). After reaching this condition the average seasonal variation is determined and  
62 subtracted from the full data which leaves us with deseasonalized data that still can contain gaps.

63 **Step 5: Interpolation of data gaps**

64 The gaps of the deseasonalized data are filled by linear interpolation. Subsequently, the CO<sub>2</sub> time series without gaps is  
65 the sum of the interpolated trend and the average seasonality.

66 **Step 6: Extrapolation for synchronization of data period**

67 Extrapolate the long-term trend to the synchronization period and then add the average seasonal variation to obtain the  
68 synchronized data. This is an optional step that is excluded in this analysis.

69 **Step 7: Calculation of the zonal and global mean mole fractions, trends, and growth rates.**

70 Global and hemispheric means, trends and growth rates are calculated by area-weighted averaging the zonal means over  
71 each latitudinal band (30°). The growth rate is determined by taking the first derivative of the long-term trend.

72 **Text S2. The CTE station network**

73 290 stations are evaluated in the CTE inversion, the observations come from the ObsPack data product (Kenneth N.,  
74 2022). The measurement methods at the stations include surface-based, shipboard-based, tower-based and aircraft-based.  
75 In this study, we only focus on data derived from the first three measurement types (i.e. aircraft-based measurements are  
76 excluded), and in total 230 out of 290 stations are selected (Figure 1). For the stations that have both surface-based and  
77 tower-based measurements, we used the tower-based measurements for analysis. For the stations that have tower-based  
78 measurements, we selected the highest measurement.

79 **Text S3. Calculation of atmospheric CO<sub>2</sub> mass**

80 CTE simulates 3D CO<sub>2</sub> mole fraction with 25 levels in the vertical direction. The CO<sub>2</sub> mass at each level of the  
81 atmosphere can be calculated as a function of air mass and CO<sub>2</sub> concentration by weight.

82 
$$m_{CO_2} = Cw_{CO_2} * m_{air} \quad (1)$$

83 where  $m_{CO_2}$  is the mass of the CO<sub>2</sub>, kg.  $Cw_{CO_2}$  is the CO<sub>2</sub> concentration by weight, w %.  $m_{air}$  is the mass of the air, kg.  
84 CO<sub>2</sub> concentration by weight is obtained by the formula below:

85 
$$Cw_{CO_2} = Cv_{CO_2} * \frac{M_{CO_2}}{M_{air}} \quad (2)$$

86 where  $Cv_{CO_2}$  is the mole fraction of CO<sub>2</sub> in air, mol / mol. According to the ideal gas assumption, equal volume of gases  
87 at same temperature and pressure contains equal number of moles regardless of chemical nature of gases, i.e. the CO<sub>2</sub>  
88 concentration by mole equals the CO<sub>2</sub> concentration by volume.  $M_{CO_2}$  is the CO<sub>2</sub> molar mass (44.009 g/mol).  $M_{air}$  is the  
89 average molar mass of dry air (28.9647 g / mol).

90 Pressure is the force applied perpendicular to the surface of an object, therefore, air pressure can be expressed by:

91 
$$p_{air} = \frac{F_{air}}{S} \quad (3)$$

92 where  $p_{air}$  is the pressure of air, Pa or N / m<sup>2</sup>. In this case,  $p_{air}$  is the difference of air pressure between adjacent level  
93 boundaries, e.g. air pressure at level 1 is  $p_1 - p_2$ .  $F_{air}$  is the magnitude of the normal force of air or gravity of air, N or  
94 kg m / s<sup>2</sup>. The gravity of air at each level can be estimated by:

95 
$$F_{air} = m_{air} * g \quad (4)$$

96 where  $g$  is the gravitational field strength, about 9.81 m / s<sup>2</sup> or N / kg.

97  $S$  is the area of the surface, m<sup>2</sup>. Here  $S$  is the area of grid cell at each level, increasing with geopotential height ( $gph$ ). It  
98 is calculated as a function of latitude and longitude on earth's surface, radius of the earth ( $R$ ), and  $gph$ .

99 
$$S = 2 * \pi * (R + gph)^2 * |\sin(lat1) - \sin(lat2)| * \frac{|lon1 - lon2|}{360} \quad (5)$$

100 Where,  $lat1$ ,  $lat2$ ,  $lon1$  and  $lon2$  are the boundary of grid cell.  $R = 6378.1370$  km, here we use the equatorial radius  
101 which is the distance from earth's center to the equator.

102 Hence the mass of the air in Eq. 1 can be estimated by:

$$103 \quad m_{air} = \frac{p_{air} * S}{g} \quad (6)$$

104 **Text S4. File list**

105 All code necessary to calculate the global mean surface CO<sub>2</sub> mole fraction and Atmospheric CO<sub>2</sub> mass is freely available  
 106 on ICOS Carbon Portal as a zipped archive (GAW\_code.zip) [<https://doi.org/10.18160/Q788-9081>], when unzipped,  
 107 the code include:

- 108 • fit\_filter\_seminoaa.ipynb  
 109 Apply the semi-NOAA method to GAW observations (139 stations), CTE observations (230 stations), CTE  
 110 model output at stations (230 stations) and CTE model output (full global)
- 111 • cal\_zonal\_global\_co2\_gaw\_seminoaa.ipynb  
 112 Calculate global co2 mole fraction average and its growth rate, and estimate their uncertainty, using output  
 113 from GAW(semi-NOAA)
- 114 • cal\_zonal\_global\_co2\_gaw\_wdcgg.ipynb  
 115 Calculate global co2 mole fraction average and its growth rate, and estimate their uncertainty, using output  
 116 from GAW(WDCGG)
- 117 • cal\_zonal\_global\_co2\_ctracker\_obs.ipynb  
 118 Calculate global co2 mole fraction average and its growth rate, and estimate their uncertainty, using output  
 119 from CTE\_obs(semi-NOAA)
- 120 • cal\_zonal\_global\_co2\_ctracker\_model\_sample.ipynb  
 121 Calculate global co2 mole fraction average and its growth rate, and estimate their uncertainty, using output  
 122 from CTE\_output(semi-NOAA)
- 123 • cal\_zonal\_global\_co2\_ctracker\_model\_global.ipynb  
 124 Calculate global co2 mole fraction average and its growth rate, and estimate their uncertainty, using output  
 125 from CTE\_global(semi-NOAA)
- 126 • cal\_co2mass\_co2ppm\_cte\_global.ipynb  
 127 Calculate global co2 mole fraction and global atmospheric co2 mass, using the 3D co2 output from CTE model
- 128 • compare\_co2\_co2rate.ipynb  
 129 Statistically compare the co2 mole fraction and its growth rate among different data sources and analysis  
 130 methods
- 131 • plot\_results.ipynb

132 The script is used to analyze and plot the results in the paper.

133 In order to run the jupyter booknotes, it needs to download the data (GAW\_data.zip) [<https://doi.org/10.18160/Q788-9081>].  
 134

135 The key results with CSV format are accessible on ICOS Carbon Portal as a zipped archive (GAW\_results.zip)  
 136 [<https://doi.org/10.18160/Q788-9081>], when unzipped, the data include:

- 137 • Global monthly and annual surface CO<sub>2</sub> mole fraction and its growth rate for 1980-2020 derived from the GAW  
 138 observations by using the semi-NOAA method, i.e. GAW (semi-NOAA).

139 Global mean:

140 df\_co2\_annual\_global\_NH\_SH\_gaw\_seminoaa.csv

141 df\_co2\_monthly\_global\_NH\_SH\_gaw\_seminoa.csv  
142 df\_co2rate\_annual\_global\_NH\_SH\_gaw\_seminoa.csv  
143 df\_co2rate\_monthly\_global\_NH\_SH\_gaw\_seminoa.csv  
144 Their uncertainty basing on bootstrap method:  
145 bootstats\_co2\_annual\_global\_gaw\_seminoa.csv  
146 bootstats\_co2\_monthly\_global\_gaw\_seminoa.csv  
147 bootstats\_co2rate\_annual\_global\_gaw\_seminoa.csv  
148 bootstats\_co2rate\_monthly\_global\_gaw\_seminoa.csv  
149 • Global monthly and annual surface CO<sub>2</sub> mole fraction and its growth rate for 1980-2020 derived from the GAW  
150 observations by using the WDCGG method without extrapolation, i.e. GAW (WDCGG).  
151 Global mean:  
152 df\_co2\_annual\_global\_NH\_SH\_gaw\_wdcgg.csv  
153 df\_co2\_monthly\_global\_NH\_SH\_gaw\_wdcgg.csv  
154 df\_co2rate\_annual\_global\_NH\_SH\_gaw\_wdcgg.csv  
155 df\_co2rate\_monthly\_global\_NH\_SH\_gaw\_wdcgg.csv  
156 Their uncertainty basing on bootstrap method:  
157 bootstats\_co2\_annual\_global\_gaw\_wdcgg.csv  
158 bootstats\_co2\_monthly\_global\_gaw\_wdcgg.csv  
159 bootstats\_co2rate\_annual\_global\_gaw\_wdcgg.csv  
160 bootstats\_co2rate\_monthly\_global\_gaw\_wdcgg.csv  
161 • Global monthly and annual surface CO<sub>2</sub> mole fraction and its growth rate for 1980-2020 derived from the  
162 observations at the CTE 230 stations by using semi-NOAA method, i.e. CTE\_obs (semi-NOAA).  
163 Global mean:  
164 co2obs\_co2\_annual\_global\_NH\_SH\_ct2021\_obs.csv  
165 co2obs\_co2\_monthly\_global\_NH\_SH\_ct2021\_obs.csv  
166 co2obs\_co2rate\_annual\_global\_NH\_SH\_ct2021\_obs.csv  
167 co2obs\_co2rate\_monthly\_global\_NH\_SH\_ct2021\_obs.csv  
168 Their uncertainty basing on bootstrap method:  
169 bootstats\_co2\_annual\_global\_cal\_ct2021\_obs.csv  
170 bootstats\_co2\_monthly\_global\_cal\_ct2021\_obs.csv  
171 bootstats\_co2rate\_annual\_global\_cal\_ct2021\_obs.csv  
172 bootstats\_co2rate\_monthly\_global\_cal\_ct2021\_obs.csv  
173 • Global monthly and annual surface CO<sub>2</sub> mole fraction and its growth rate for 2001-2020 derived from the CTE  
174 model output sampling at the CTE 230 stations by using semi-NOAA method, i.e. CTE\_output (semi-NOAA).  
175 Global mean:  
176 co2model\_co2\_annual\_global\_NH\_SH\_ct2021\_modelsample.csv  
177 co2model\_co2\_monthly\_global\_NH\_SH\_ct2021\_modelsample.csv  
178 co2model\_co2rate\_annual\_global\_NH\_SH\_ct2021\_modelsample.csv  
179 co2model\_co2rate\_monthly\_global\_NH\_SH\_ct2021\_modelsample.csv  
180 Their uncertainty basing on bootstrap method:

181 bootstats\_co2\_annual\_global\_cal\_ct2021\_modelsample.csv  
182 bootstats\_co2\_monthly\_global\_cal\_ct2021\_modelsample.csv  
183 bootstats\_co2rate\_annual\_global\_cal\_ct2021\_modelsample.csv  
184 bootstats\_co2rate\_monthly\_global\_cal\_ct2021\_modelsample.csv  
185 • Global monthly and annual surface CO<sub>2</sub> mole fraction and its growth rate for 2001-2020 derived from the CTE  
186 model output covers full global (averaged over the first three levels, 0 to 0.35 km Alt.) by using semi-NOAA  
187 method, i.e. CTE\_global (semi-NOAA)  
188 co2\_annual\_global\_cte2021(level1-3)\_seminoaa.csv  
189 co2\_monthly\_global\_cte2021(level1-3)\_seminoaa.csv  
190 co2rate\_annual\_global\_cte2021(level1-3)\_seminoaa.csv  
191 co2rate\_monthly\_global\_cte2021(level1-3)\_seminoaa.csv  
192 • Global monthly and annual surface CO<sub>2</sub> mole fraction for 2001-2020 derived from the CTE model output covers  
193 full global with different heights (i.e. level1-3 and level1-25).  
194 cte2021(lv1-3)\_co2\_2000\_2020\_annual.csv  
195 cte2021(lv1-3)\_co2\_2000\_2020\_monthly.csv  
196 cte2021(lv1-25)\_co2\_2000\_2020\_annual.csv  
197 cte2021(lv1-25)\_co2\_2000\_2020\_monthly.csv  
198 • Global monthly and annual atmospheric CO<sub>2</sub> mass (up to ~200 km) for 2000-2020 derived from the CTE model  
199 output by using the method described in Text S3.  
200 cte2021\_co2mass\_2000\_2020\_monthly.csv  
201 cte2021\_co2mass\_2000\_2020\_annual.csv  
202  
203  
204

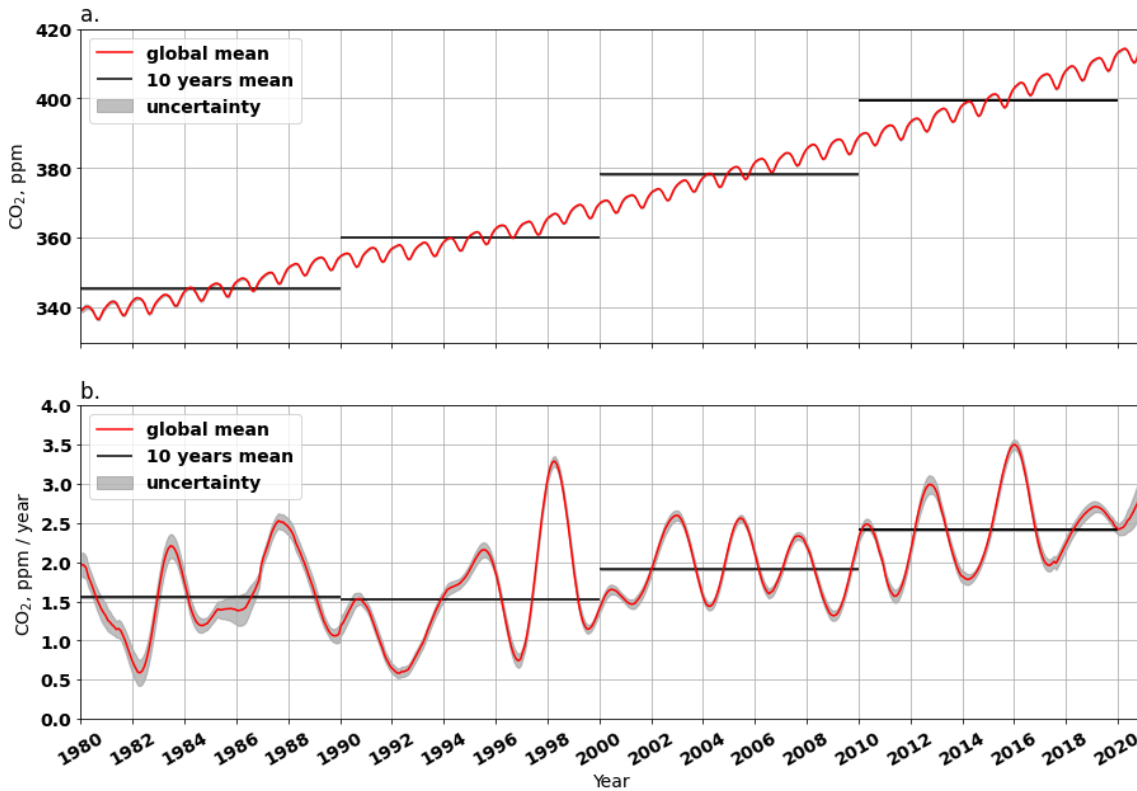

205  
 206 **Figure S1. Globally averaged CO<sub>2</sub> mole fraction (a) and its G<sub>ATM</sub> (b) from 1980 to 2021. In panel (a), the red line**  
 207 **shows the mean CO<sub>2</sub> mole fraction, black lines show the mean CO<sub>2</sub> mole fraction over 10 years, the grey area**  
 208 **shows the uncertainty derived from the 200 bootstrap networks. Similarly, panel (b) shows the G<sub>ATM</sub> instead of**  
 209 **the mole fraction. The CO<sub>2</sub> and its G<sub>ATM</sub> results are derived from the GAW observations from 139 stations by**  
 210 **using semi-NOAA method.**

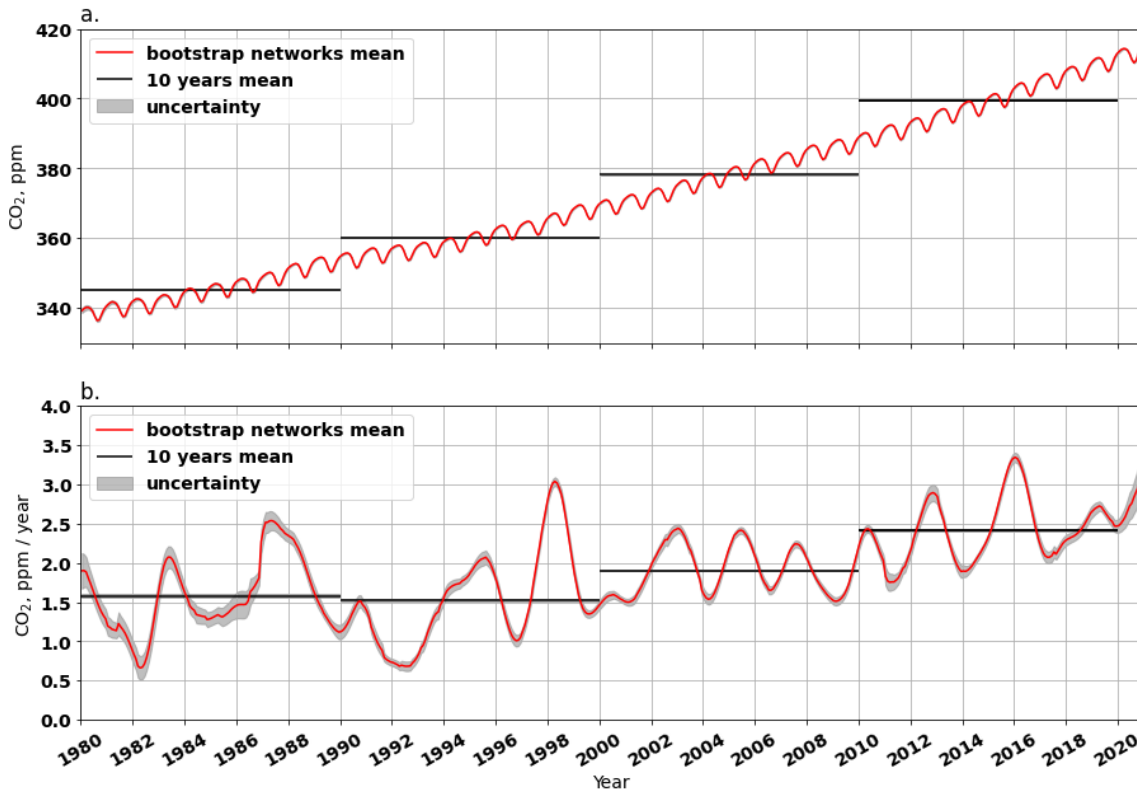

211  
 212 **Figure S2. Globally averaged CO<sub>2</sub> mole fraction (a) and its G<sub>ATM</sub> (b) from 1980 to 2021. In panel (a), black lines**  
 213 **show the mean CO<sub>2</sub> mole fraction over 10 years, the grey lines show the 200 bootstrap networks, the red line**

214 shows the mean of the 200 bootstrap networks. Similarly, panel (b) shows the  $G_{ATM}$  results instead of  $CO_2$  mole  
 215 fraction. This result is derived from the GAW observations from 139 stations by using WDCGG method.

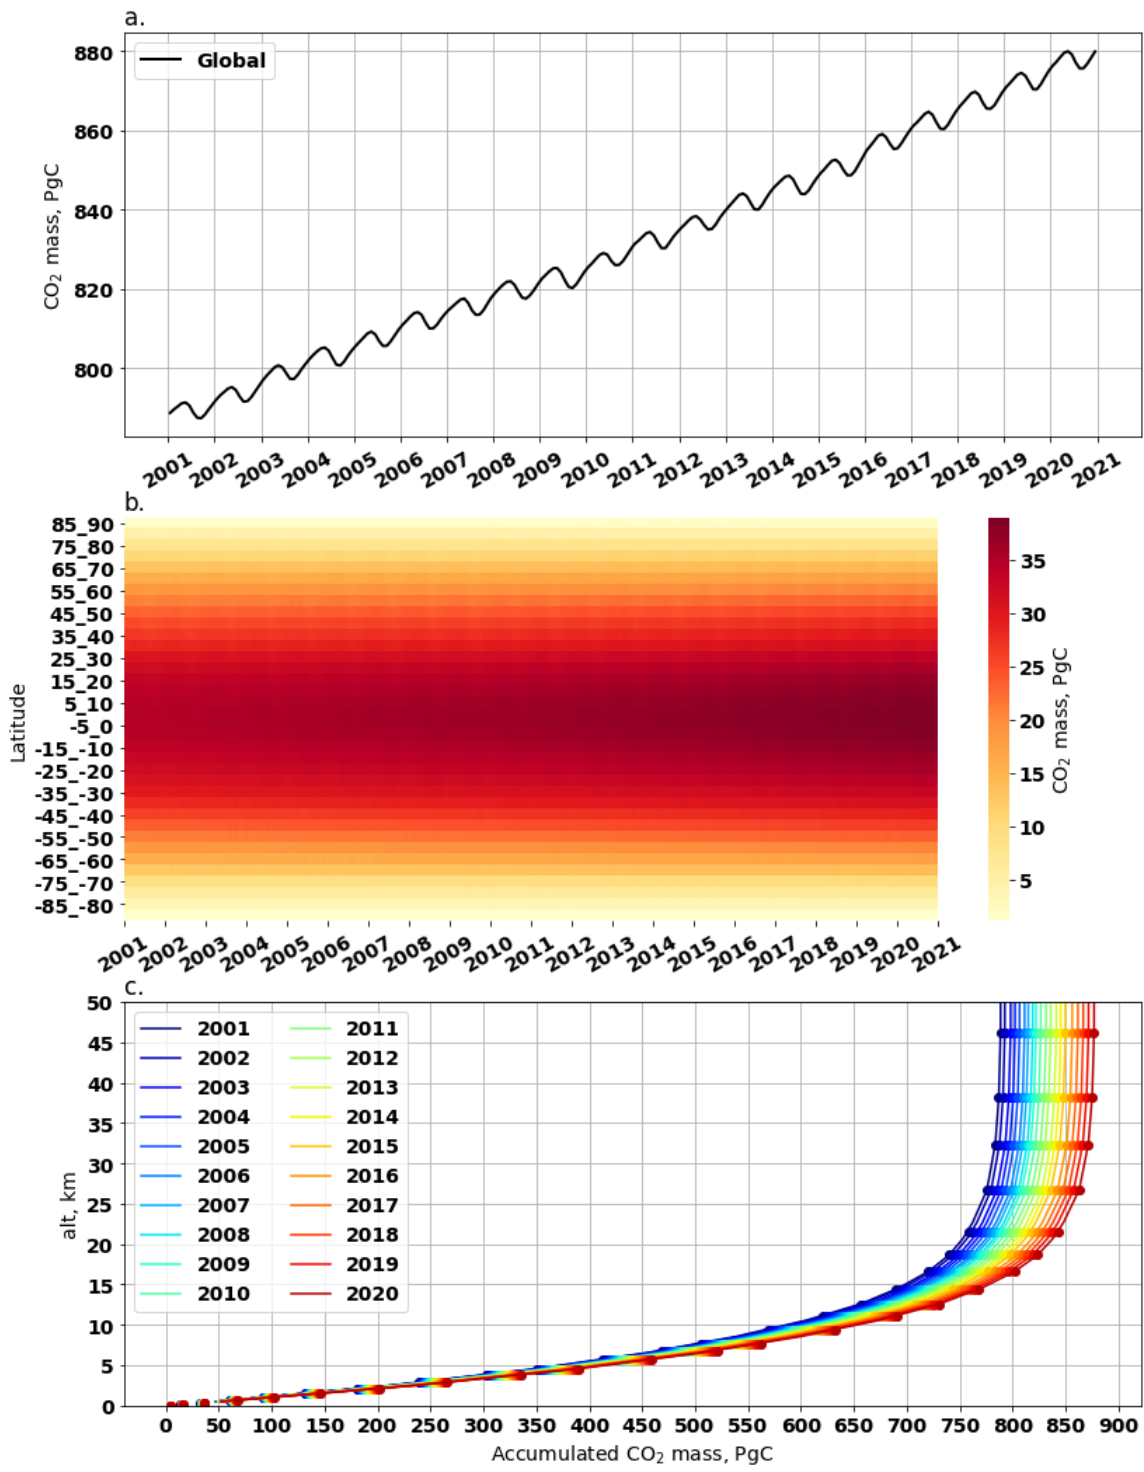

216  
 217 **Figure S3. Atmospheric CO<sub>2</sub> mass derived from CTE output. Panel (a) shows the global monthly CO<sub>2</sub> mass in**  
 218 **atmosphere (from surface up to 200 km altitude). Panel (b) shows the zonal (5°) average of monthly CO<sub>2</sub> mass.**  
 219 **Panel (c) shows accumulated CO<sub>2</sub> mass with altitudes from 2001 to 2020, the dots mark CTE vertical level**  
 220 **altitudes and lines are the linear interpolation between the altitudes.**



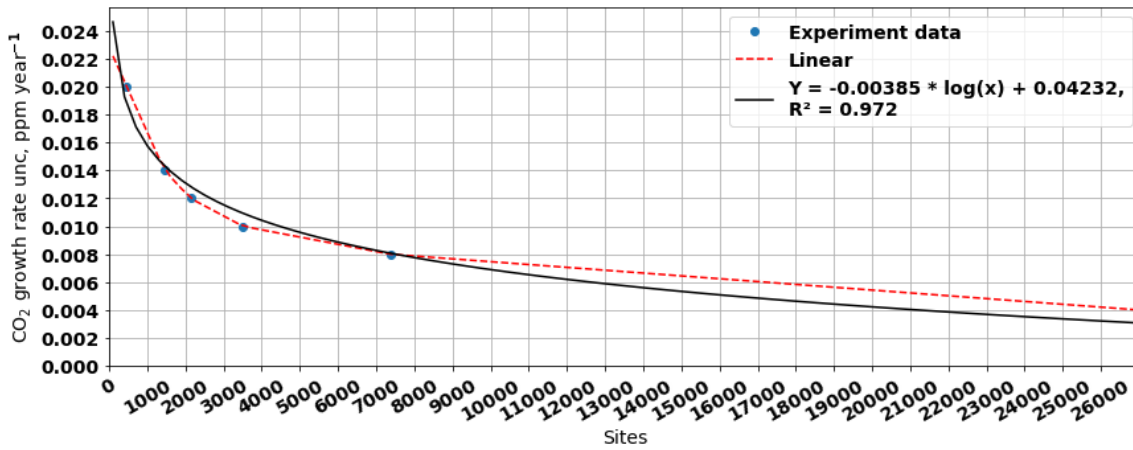

221

222 **Figure S4. The relationship between the uncertainty of the global CO<sub>2</sub> growth rate and the number of observation**  
 223 **sites. The relationship is estimated using CTE\_global (all global grids excluding ocean grids) with different**  
 224 **resolutions (1x1, 2x2, 3x3, 4x4, 5x5, and 10x10 degrees) to estimate the uncertainty of the global CO<sub>2</sub> growth rate.**  
 225 **The bootstrap method mentioned in the main text is used to estimate the uncertainty, and the results are**  
 226 **represented as blue dots. The red dashed line shows the linear interpolation between the experimental results,**  
 227 **while the black line shows an exponential curve fitting.**

228

229

230

231

232

233

234

235

236

237

238

239

240

241

242

243

244

245

246

247

248

249

250

251

252

253

254

255

256

257

258

259

260

261

262

263

264

| a. GAW (WDCGG), 1980-2020                   |                 |                  |                 |                  | b. NOAA, 1980-2020                          |                  |                 |                  |
|---------------------------------------------|-----------------|------------------|-----------------|------------------|---------------------------------------------|------------------|-----------------|------------------|
|                                             | Annual          |                  | Monthly         |                  | Annual                                      |                  | Monthly         |                  |
| Statistic                                   | CO <sub>2</sub> | G <sub>ATM</sub> | CO <sub>2</sub> | G <sub>ATM</sub> | CO <sub>2</sub>                             | G <sub>ATM</sub> | CO <sub>2</sub> | G <sub>ATM</sub> |
| <b>r</b>                                    | 0.999           | 0.991            | 0.999           | 0.987            | 0.999                                       | 0.980            | 0.999           | 0.970            |
| <b>RMSE</b>                                 | 0.053           | 0.081            | 0.145           | 0.108            | 0.352                                       | 0.121            | 0.519           | 0.162            |
| <b>MAE</b>                                  | 0.043           | 0.070            | 0.114           | 0.086            | 0.329                                       | 0.094            | 0.449           | 0.129            |
| <b>ME</b>                                   | 0.007           | 0.005            | 0.007           | 0.005            | -0.329***                                   | -0.025           | -0.329***       | -0.025***        |
| <b>c. CTE_obs (semi-NOAA), 1980-2020</b>    |                 |                  |                 |                  | <b>d. CTE_obs (semi-NOAA), 2001-2020</b>    |                  |                 |                  |
| <b>r</b>                                    | 0.999           | 0.984            | 0.999           | 0.981            | 0.999                                       | 0.963            | 0.999           | 0.961            |
| <b>RMSE</b>                                 | 0.324           | 0.104            | 0.420           | 0.125            | 0.401                                       | 0.115            | 0.487           | 0.136            |
| <b>MAE</b>                                  | 0.275           | 0.081            | 0.340           | 0.100            | 0.370                                       | 0.086            | 0.398           | 0.107            |
| <b>ME</b>                                   | 0.093*          | -0.020           | 0.093***        | -0.020***        | 0.368***                                    | -0.007           | 0.368***        | -0.007           |
| <b>e. CTE_output (semi-NOAA), 2001-2020</b> |                 |                  |                 |                  | <b>f. CTE_global (semi-NOAA), 2001-2020</b> |                  |                 |                  |
| <b>r</b>                                    | 0.999           | 0.917            | 0.999           | 0.904            | 0.999                                       | 0.903            | 0.999           | 0.896            |
| <b>RMSE</b>                                 | 0.395           | 0.174            | 0.476           | 0.214            | 0.261                                       | 0.192            | 0.347           | 0.230            |
| <b>MAE</b>                                  | 0.348           | 0.131            | 0.389           | 0.174            | 0.220                                       | 0.158            | 0.279           | 0.195            |
| <b>ME</b>                                   | 0.299***        | -0.015           | 0.299***        | -0.015           | 0.186***                                    | -0.012           | 0.186***        | -0.012           |

265 Note paired t-test significant level for ME: \* p<0.1, \*\* p<0.05, \*\*\* p<0.01

266 **Table S1. Statistic metrics assessing the agreement of the global CO<sub>2</sub> mole fraction (ppm) and its G<sub>ATM</sub> (ppm yr<sup>-1</sup>) from GAW observations (139 sites) using the semi-NOAA method (GAW (semi-NOAA)) with, a. GAW**  
267 **(WDCGG), GAW observations using the WDCGG method without extrapolation (1980-2020), b. NOAA analysis**  
268 **for observations from the NOAA 43 sites (1980-2020), c. CTE\_obs (semi-NOAA), CTE observations (230 sites)**  
269 **using the semi-NOAA method (1980-2020), d. CTE observations (230 sites) using the semi-NOAA method (2001-**  
270 **2020), e. CTE\_output(semi-NOAA), CTE output at the 230 sites using the semi-NOAA method (2001-2020), f.**  
271 **CTE\_global (semi-NOAA), CTE full global grids (averaged over the first three levels, 0 to 0.35 km Alt.) using the**  
272 **semi-NOAA method (2001-2020). The statistical metrics include: Pearson Correlation Coefficient (r), which**  
273 **ranges from -1 to 1, Root Mean Squared Error (RMSE), Mean Absolute Error (MAE), and Mean Error (ME).**  
274 **The negative sign on ME means that the GAW (semi-NOAA) has higher values, vice versa.**  
275

276

277

278

279

| GAW (WDCGG+) vs GAW (WDCGG), 1984-2020 |                 |                  |                 |                  |
|----------------------------------------|-----------------|------------------|-----------------|------------------|
|                                        | Annual          |                  | Monthly         |                  |
| Statistic                              | CO <sub>2</sub> | G <sub>ATM</sub> | CO <sub>2</sub> | G <sub>ATM</sub> |
| <b>r</b>                               | 0.999           | 0.994            | 0.999           | 0.992            |
| <b>RMSE</b>                            | 0.130           | 0.062            | 0.180           | 0.076            |
| <b>MAE</b>                             | 0.115           | 0.037            | 0.151           | 0.042            |
| <b>ME</b>                              | 0.096***        | -0.011           | 0.096***        | -0.011***        |

280 Note paired t-test significant level for ME: \* p<0.1, \*\* p<0.05, \*\*\* p<0.01

281 **Table S2. Statistic metrics assessing the agreement of the global CO<sub>2</sub> mole fraction (CO<sub>2</sub>, ppm) and its G<sub>ATM</sub> (ppm**  
 282 **yr<sup>-1</sup>) from GAW (WDCGG) and GAW (WDCGG+) during common period 1984-2020. GAW (WDCGG) is GAW**  
 283 **observations (139 sites) analysed by using the WDCGG method without extrapolation. GAW (WDCGG+) is**  
 284 **GAW observations (139 sites) analysed by using the WDCGG method with extrapolation. The statistical metrics**  
 285 **include: Pearson Correlation Coefficient (r), which ranges from -1 to 1, Root Mean Squared Error (RMSE),**  
 286 **Mean Absolute Error (MAE), and Mean Error (ME). The negative values in ME means the GAW (WDCGG)**  
 287 **has higher values, vice versa.**  
 288

| CTE output (semi-NOAA) vs CTE obs (semi-NOAA), 2001-2020 |                 |                  |                 |                  |
|----------------------------------------------------------|-----------------|------------------|-----------------|------------------|
|                                                          | Annual          |                  | Monthly         |                  |
| Statistic                                                | CO <sub>2</sub> | G <sub>ATM</sub> | CO <sub>2</sub> | G <sub>ATM</sub> |
| <b>r</b>                                                 | 0.999           | 0.896            | 0.999           | 0.881            |
| <b>RMSE</b>                                              | 0.192           | 0.191            | 0.270           | 0.235            |
| <b>MAE</b>                                               | 0.153           | 0.143            | 0.212           | 0.195            |
| <b>ME</b>                                                | -0.069          | -0.008           | -0.069***       | -0.008           |

289 Note paired t-test significant level for ME: \* p<0.1, \*\* p<0.05, \*\*\* p<0.01

290 **Table S3. Statistic metrics assessing the agreement of the global CO<sub>2</sub> mole fraction (CO<sub>2</sub>, ppm) and its G<sub>ATM</sub> (ppm**  
 291 **yr<sup>-1</sup>) from CTE\_output (semi-NOAA) and CTE\_obs (semi-NOAA) during common period 2001-2020. CTE\_obs**  
 292 **(semi-NOAA) is CTE observations (230 sites) analysed by using the semi-NOAA method. CTE\_output (semi-**  
 293 **NOAA) is CTE output at the 230 sites analysed by using the semi-NOAA method. The statistical metrics include:**  
 294 **Pearson Correlation Coefficient (r), which ranges from -1 to 1, Root Mean Squared Error (RMSE), Mean**  
 295 **Absolute Error (MAE), and Mean Error (ME). The negative values in ME means the CTE\_obs (semi-NOAA)**  
 296 **has higher values, vice versa.**  
 297  
 298
